# Supplementary material for: Communicating Confidence of Per- and Polyfluoroalkyl Substance Identification via High-Resolution Mass Spectrometry
Source: PubMed Central journal article supplement — Environ Sci Technol Lett. 2022 May 26;9(6):473–81. doi: 10.1021/acs.estlett.2c00206 (PMC9202347; doi:10.1021/acs.estlett.2c00206), 2022-05-26
Supplement: ez2c00206_si_001.pdf [file ez2c00206_si_001.pdf]

*Supporting Information*

**Communicating Confidence of Per- and Polyfluoroalkyl Substance (PFAS)  
Identification via High Resolution Mass Spectrometry**

Joseph A. Charbonnet<sup>ab</sup>, Carrie A. McDonough<sup>c</sup>, Feng Xiao<sup>d</sup>, Trever Schwichtenberg<sup>e</sup>, Dunning Cao<sup>e</sup>, Sarit Kaserzon<sup>f</sup> Kevin V. Thomas<sup>f</sup>, Pradeep Dewapriya<sup>f</sup>, Benjamin J. Place<sup>g</sup>, Emma L. Schymanski<sup>h</sup>, Jennifer A. Field<sup>i</sup>, Damian E. Helbling<sup>j</sup>, and Christopher P. Higgins<sup>af\*</sup>

<sup>a</sup>Department of Civil and Environmental Engineering, Colorado School of Mines,  
Golden, CO, USA

<sup>b</sup>Department of Civil, Construction and Environmental Engineering, Iowa State University,  
Ames, IA, United States

<sup>c</sup>Department of Civil Engineering, Stony Brook University, Stony Brook, NY, USA

<sup>d</sup>Department of Civil Engineering, University of North Dakota, Grand Forks, ND, USA

<sup>e</sup>Department of Chemistry, Oregon State University, Corvallis, Oregon, USA

<sup>f</sup>Queensland Alliance for Environmental Health Sciences (QAEHS), The University of  
Queensland, Woolloongabba, QLD, Australia

<sup>g</sup>National Institute of Standards and Technology, Gaithersburg, MD, USA

<sup>h</sup>Luxembourg Centre for Systems Biomedicine (LCSB), University of Luxembourg, Belvaux,  
Luxembourg

<sup>i</sup>Department of Environmental and Molecular Toxicology, Oregon State University, Corvallis,  
OR, USA

<sup>j</sup>School of Civil and Environmental Engineering, Cornell University, Ithaca, NY, USA

\*Corresponding Author. Civil and Environmental Engineering, 1500 Illinois Street, Golden, CO  
80401; phone: 720-984-2116; email: [chiggins@mines.edu](mailto:chiggins@mines.edu)

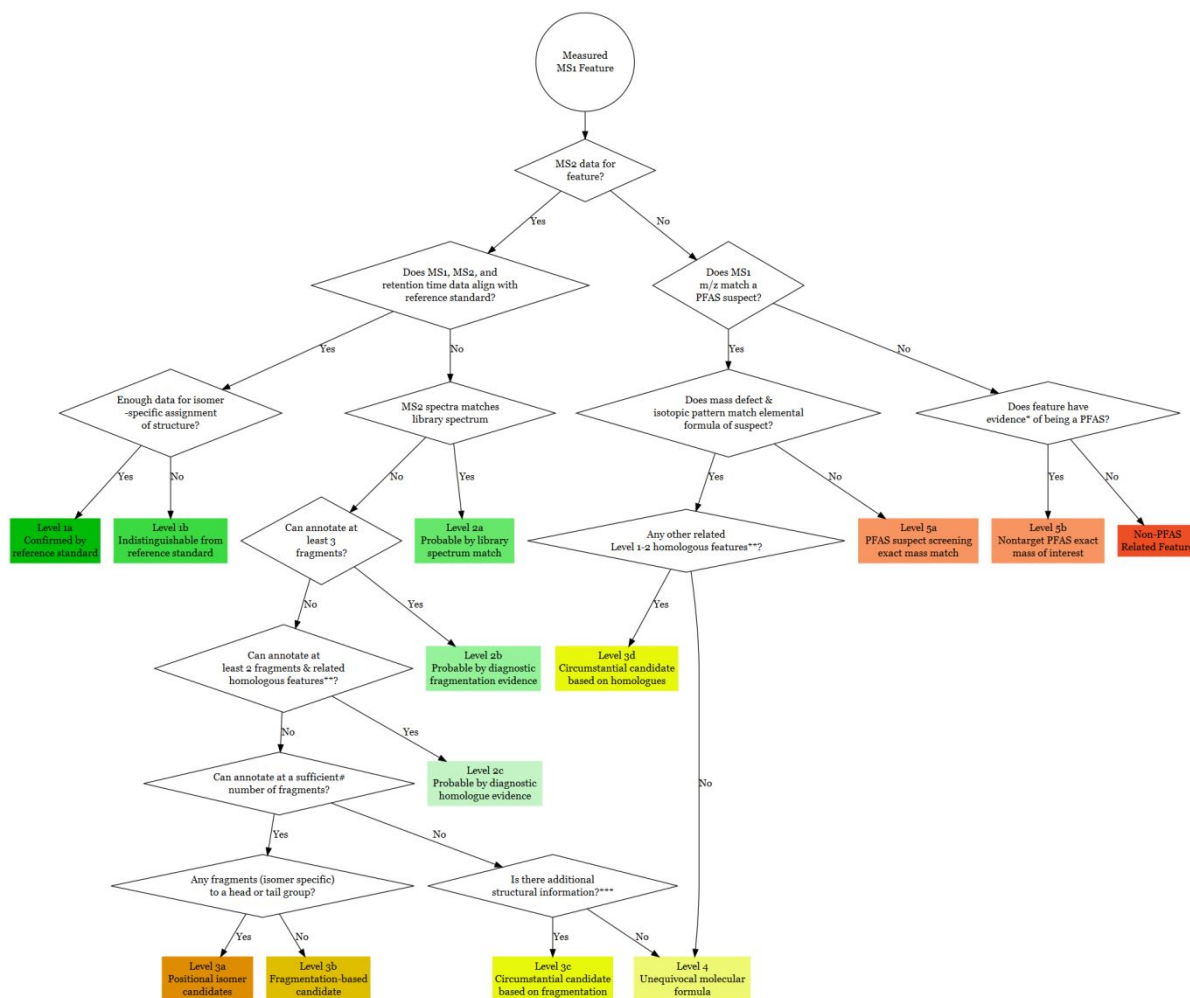

**Figure S1.** Confidence of PFAS identification example workflow.

**Footnotes:**

\*Evidence of being a PFAS described in Level 5b text

\*\*Related homologous features are  $\pm m/z$  50 or 100 and expected retention time interval from a level 1-2 feature

\*\*\*Including:

- Observation of sufficient number of fragments to exclude other structural isomers, based on *in silico* predicted MS/MS fragments for the proposed structure.
- Fractionation of species by positive or negative charge through anion or cation exchange solid-phase extraction.
- Detection of possible zwitterionic PFASs in both positive and negative ionization modes.
- Chromatography indicative of electrochemical fluorination. In such cases, often a branched isomer peak (or peaks) is followed by a linear isomer peak.
- The abundance of homologues that are separated by  $-(CF_2CF_2)-$  (i.e., 99.9936 Da). Elevated concentrations of only even- or odd-length homologues are indicative of fluorotelomerization. The lengths of homologues are more uniformly distributed in typical electrochemical fluorination-based mixtures.
- A positive mass defect for candidate PFASs, which may indicate the presence of non-fluorinated functional groups in the structure.

#Sufficient defined as the number of fragments needed to align a structure with a particular PFAS subclass (see section titled “High-Resolution MS/MS Spectra” for more information)

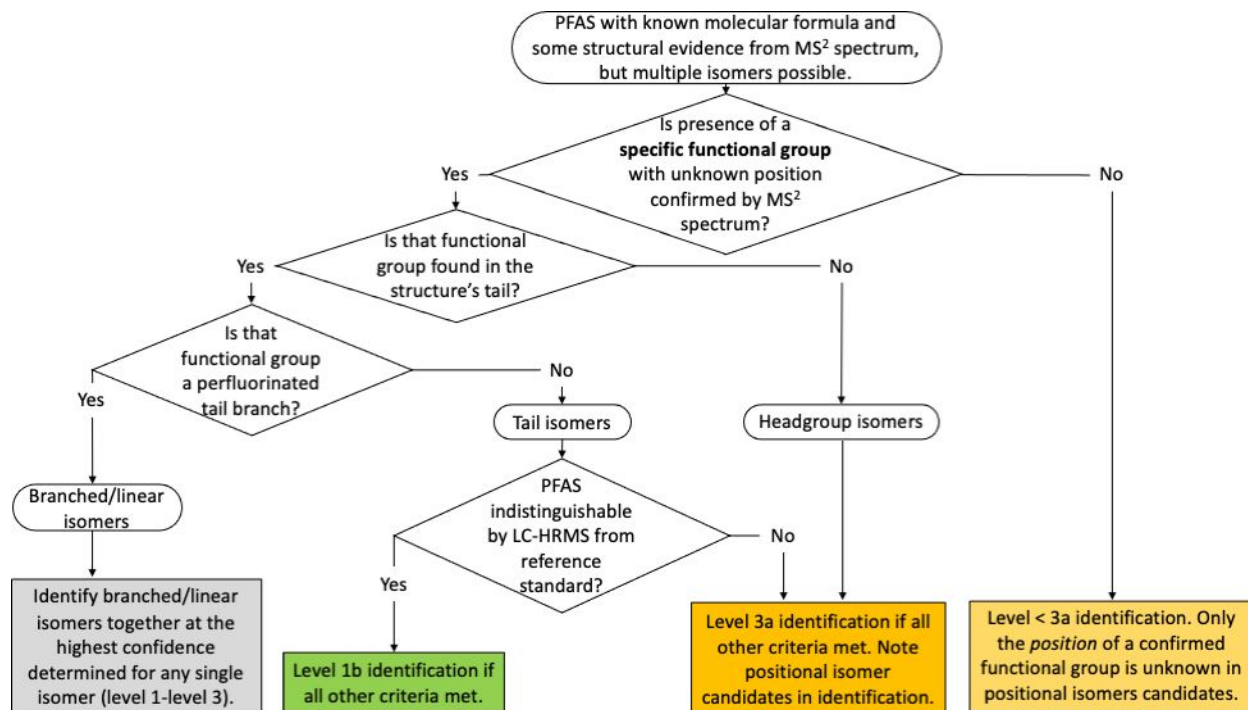

**Figure S2.** Guidance for classification and identification of PFASs with some evidence of structure from MS/MS spectrum, but multiple isomers possible. Isomer candidates may be determined entirely from structural evidence or from structural evidence and PFAS suspect lists.
